# Supplementary material for: Structural Characterization of Quinoa Polysaccharide and Its Inhibitory Effects on 3T3-L1 Adipocyte Differentiation
Source: PubMed Central journal article supplement (PMC7589720; doi:10.3390/foods9101511), 2020-10-21
Supplement: foods-09-01511-s001.pdf [file foods-09-01511-s001.pdf]

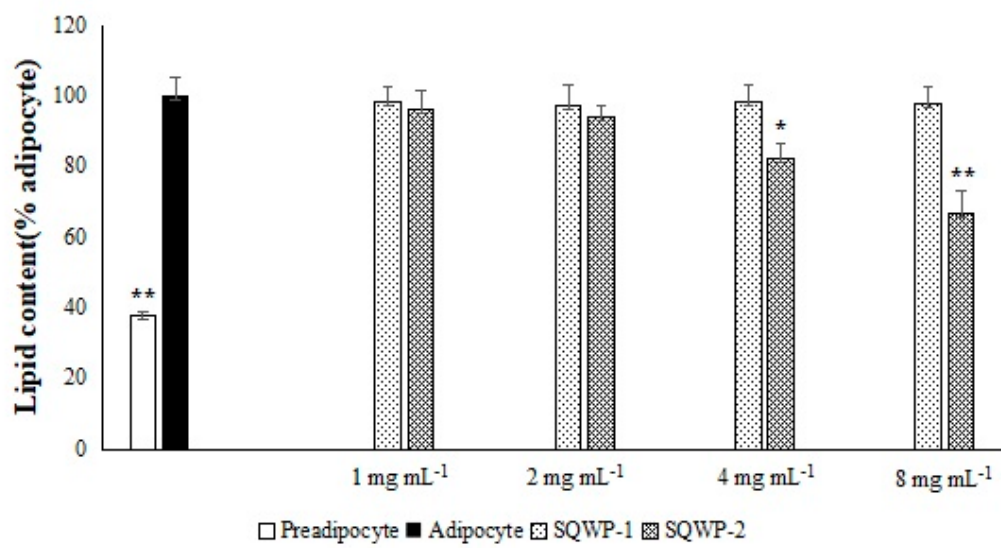

**Figure S1.** Effects of SQWP-1 and SQWP-2 on 3T3-L1 cells inhibiting differentiation.

### $\beta$ -actin: Amplification curve

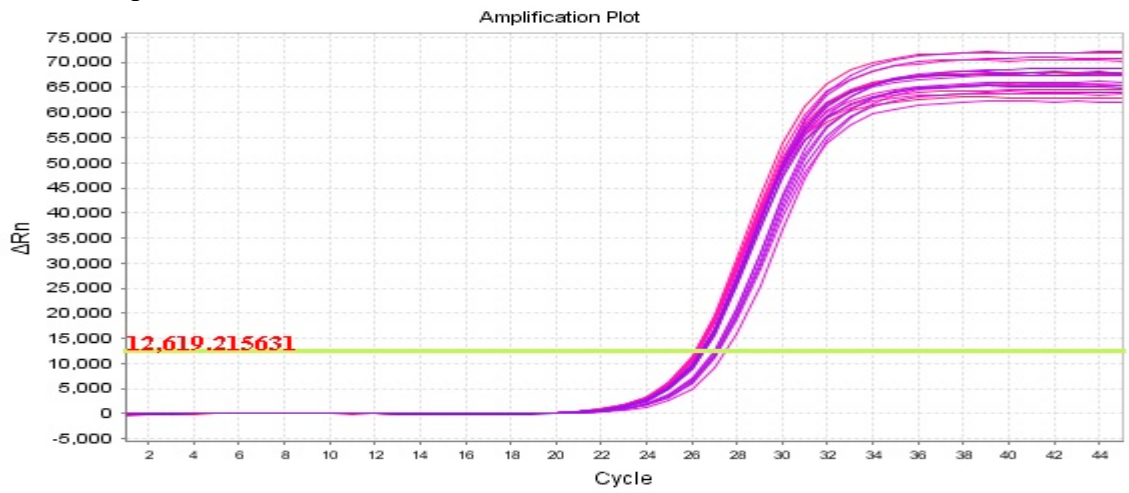

### Dissolution curve

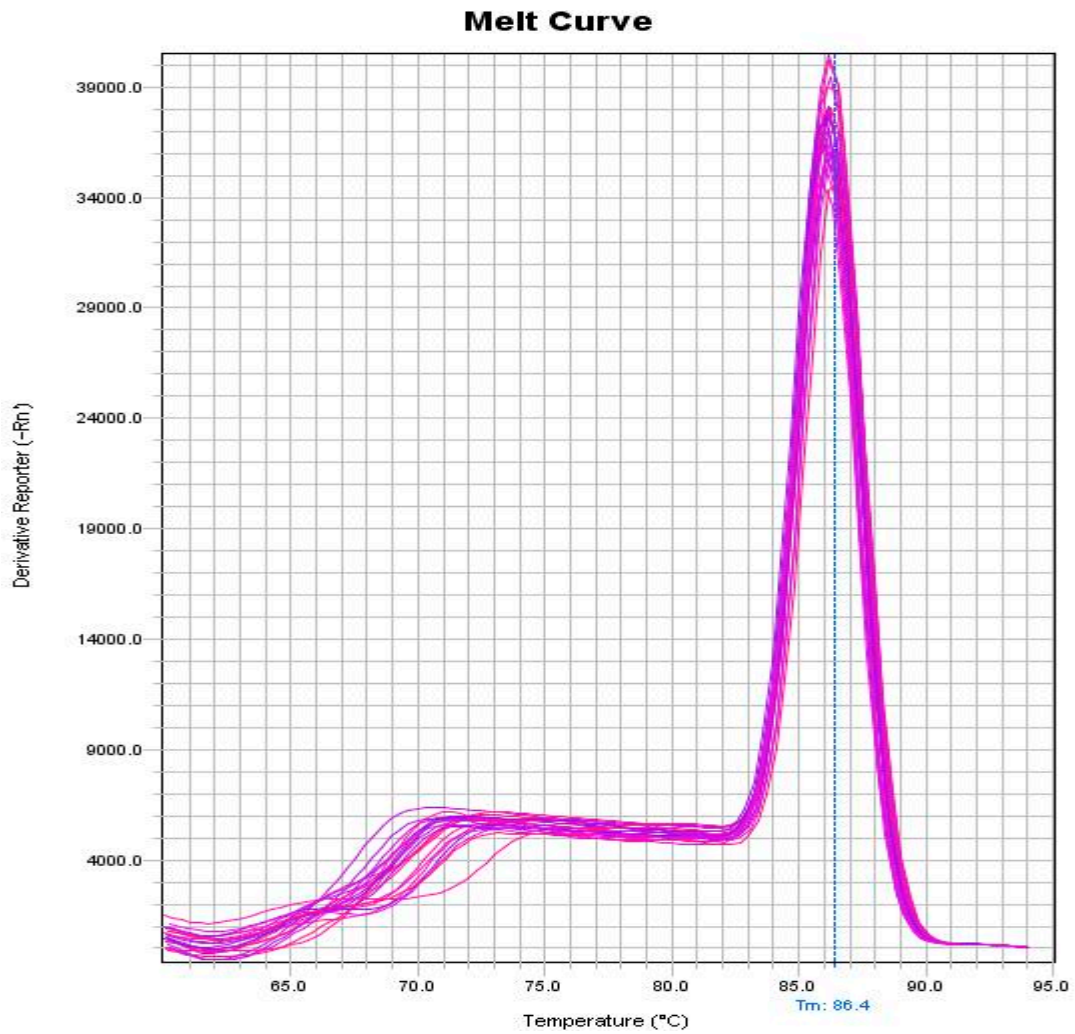

PPAR $\gamma$ : Amplification curve

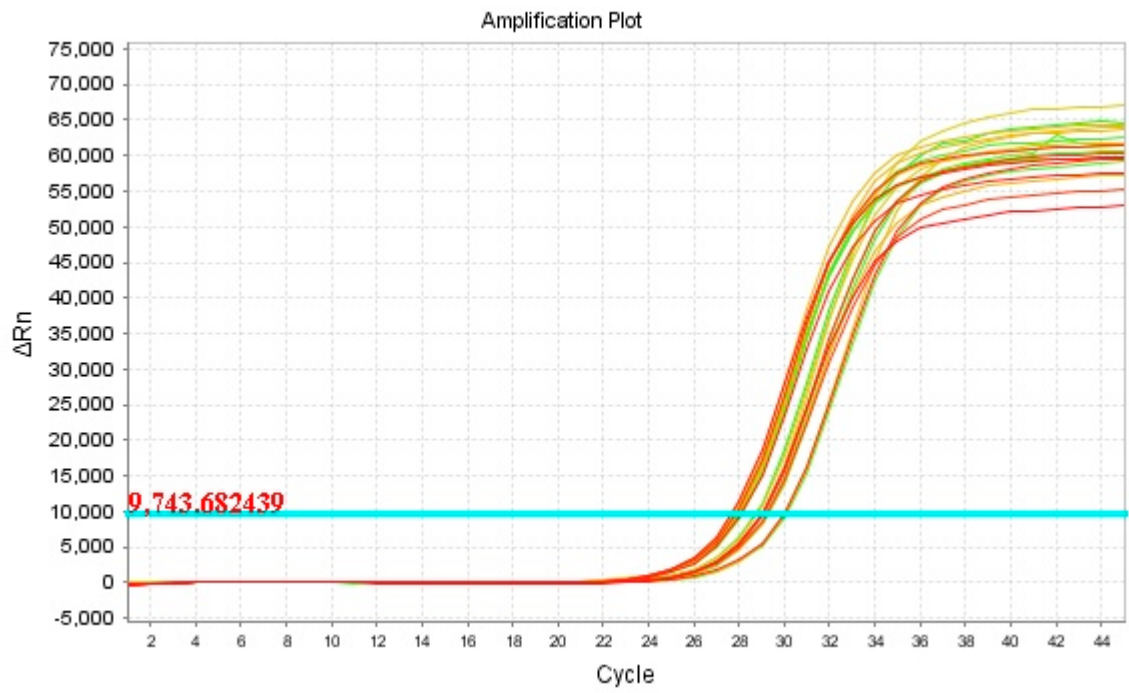

Dissolution curve

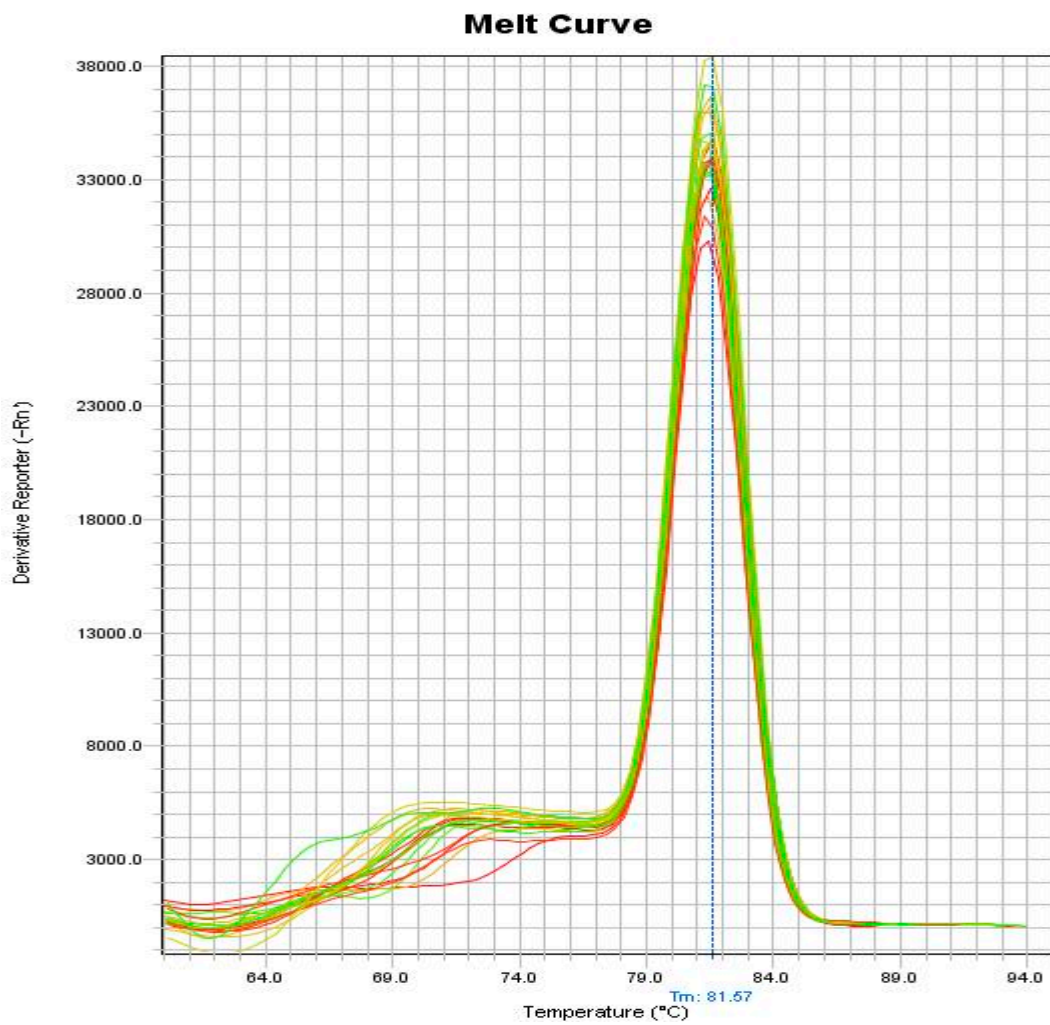

C/EBP $\alpha$ : Amplification curve

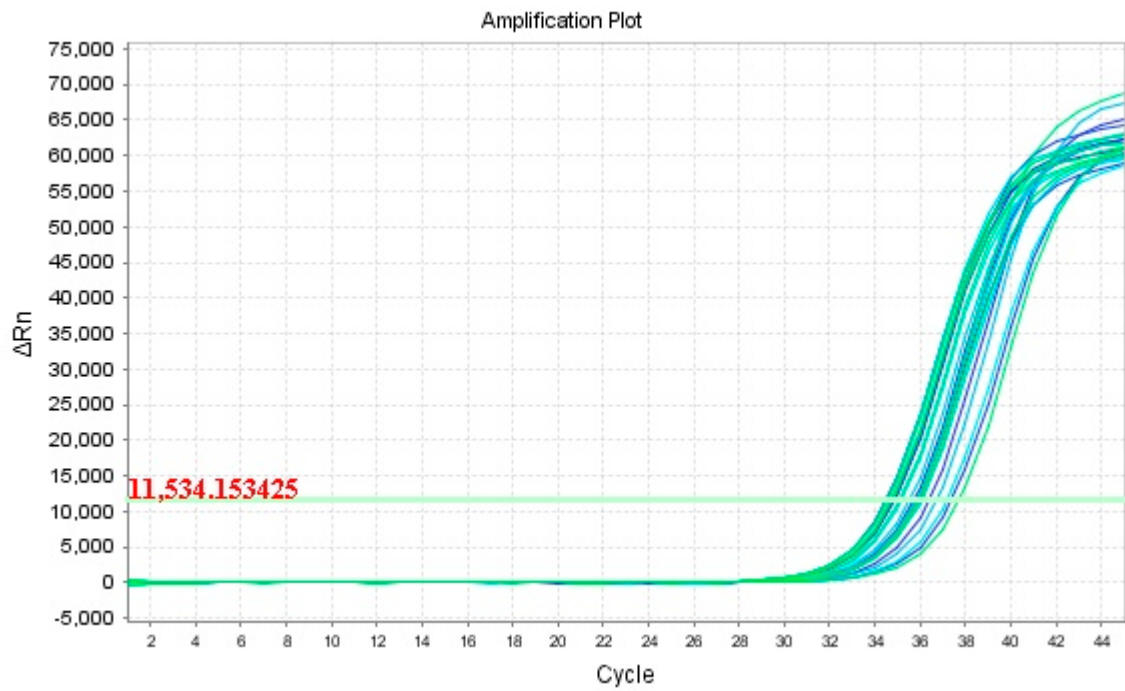

Dissolution curve

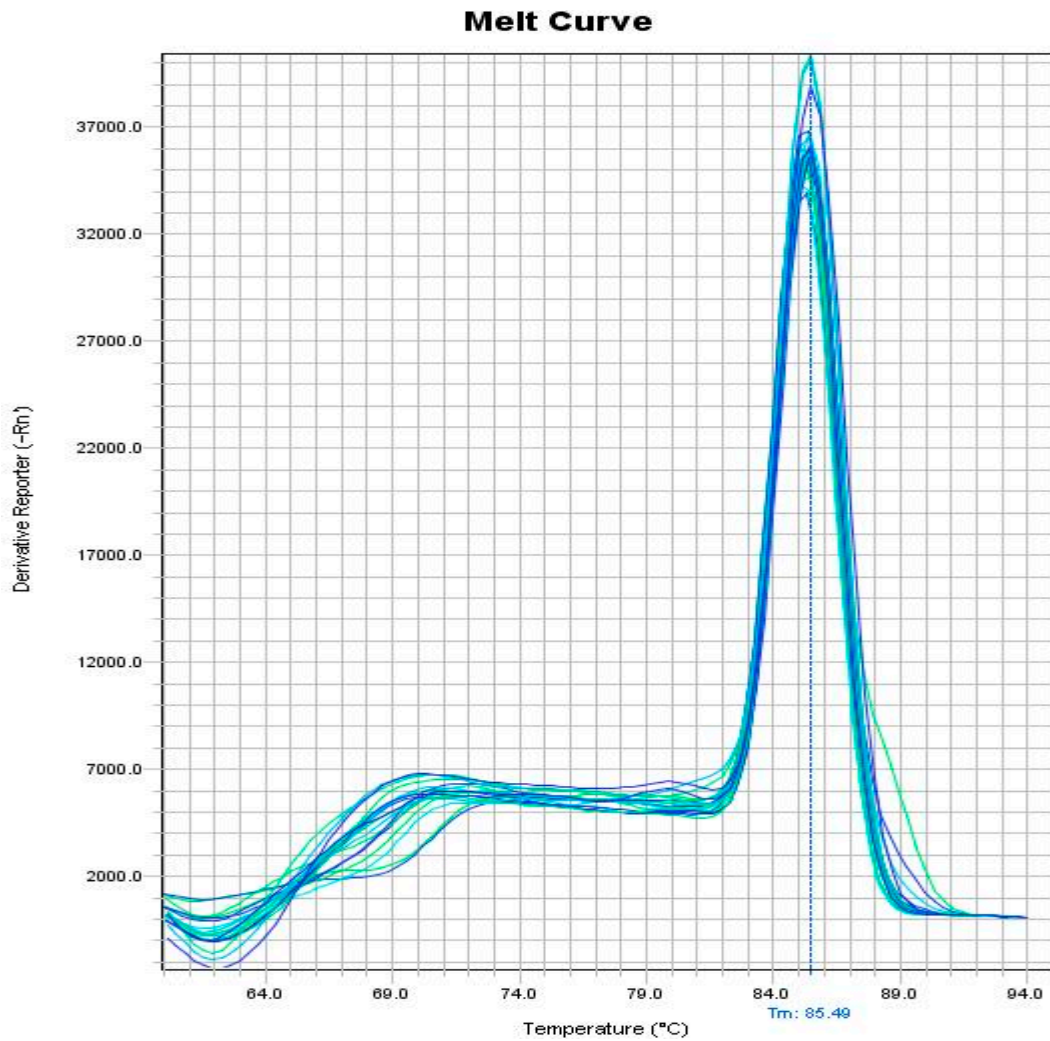

C/EBP $\beta$ : Amplification curve

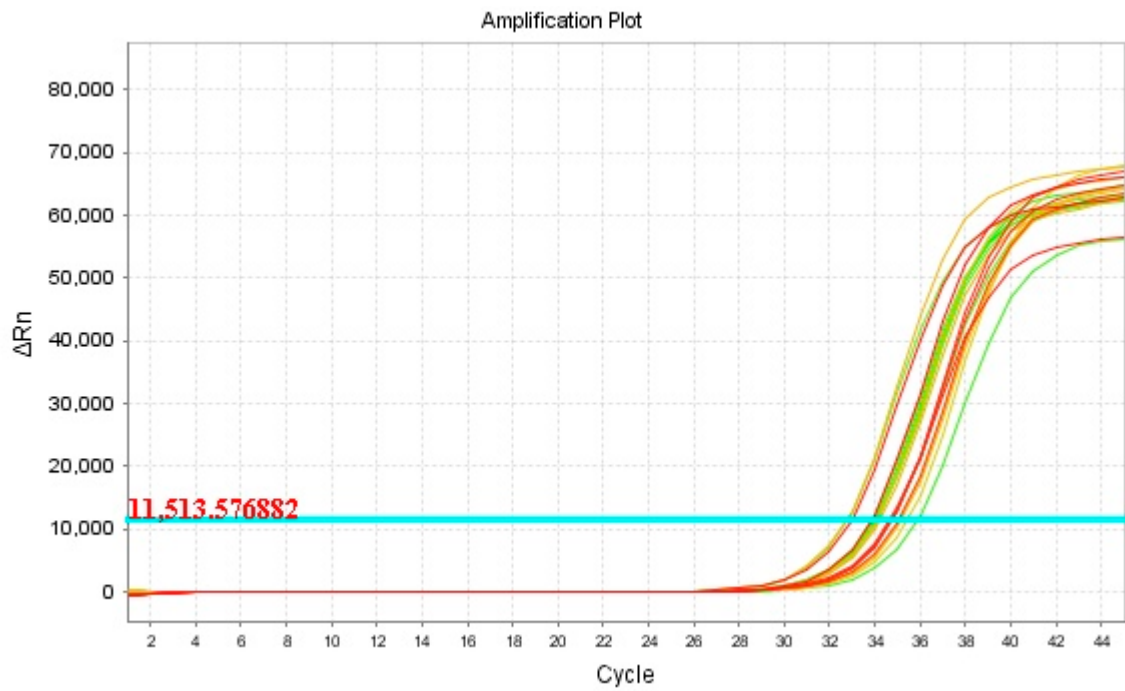

Dissolution curve

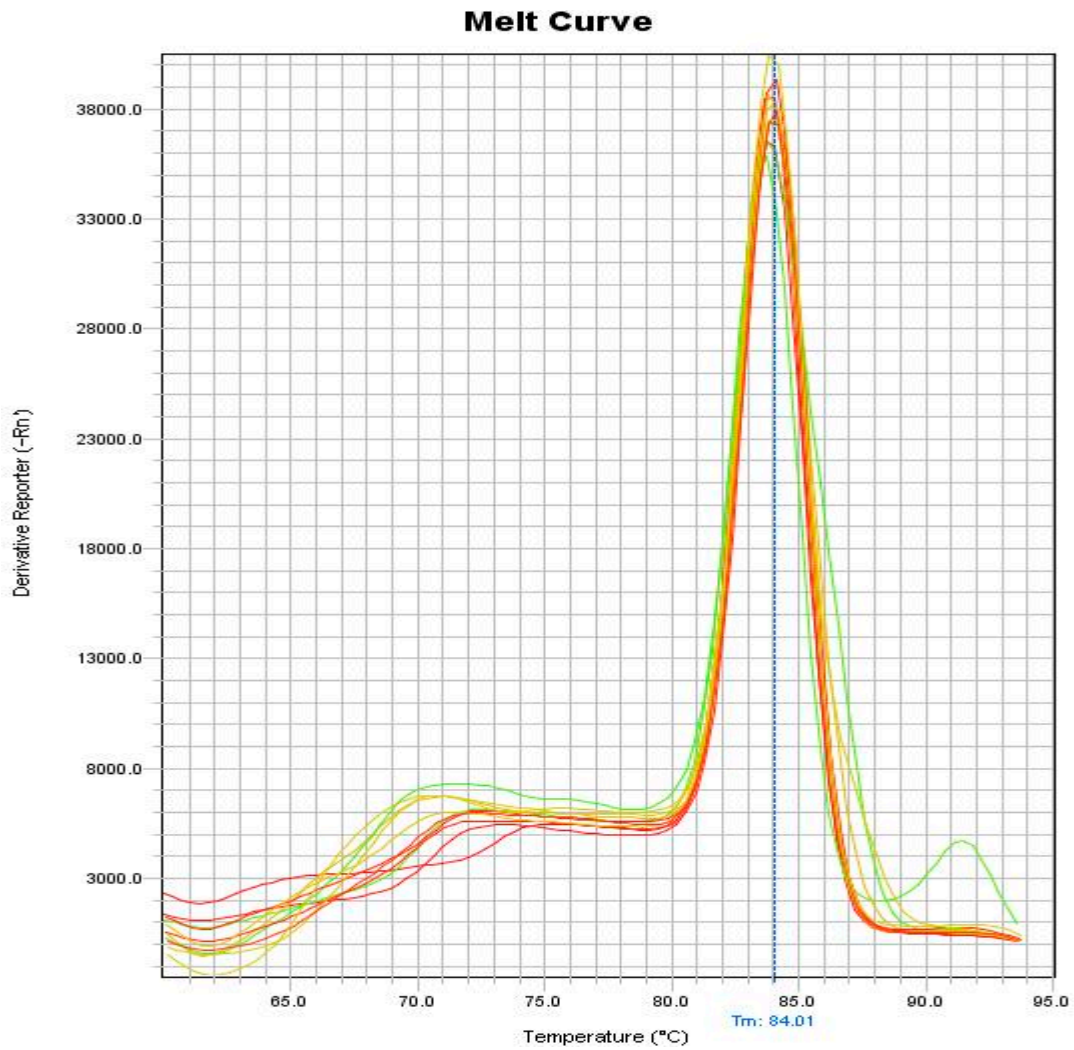

C/EBP $\delta$ : Amplification curve

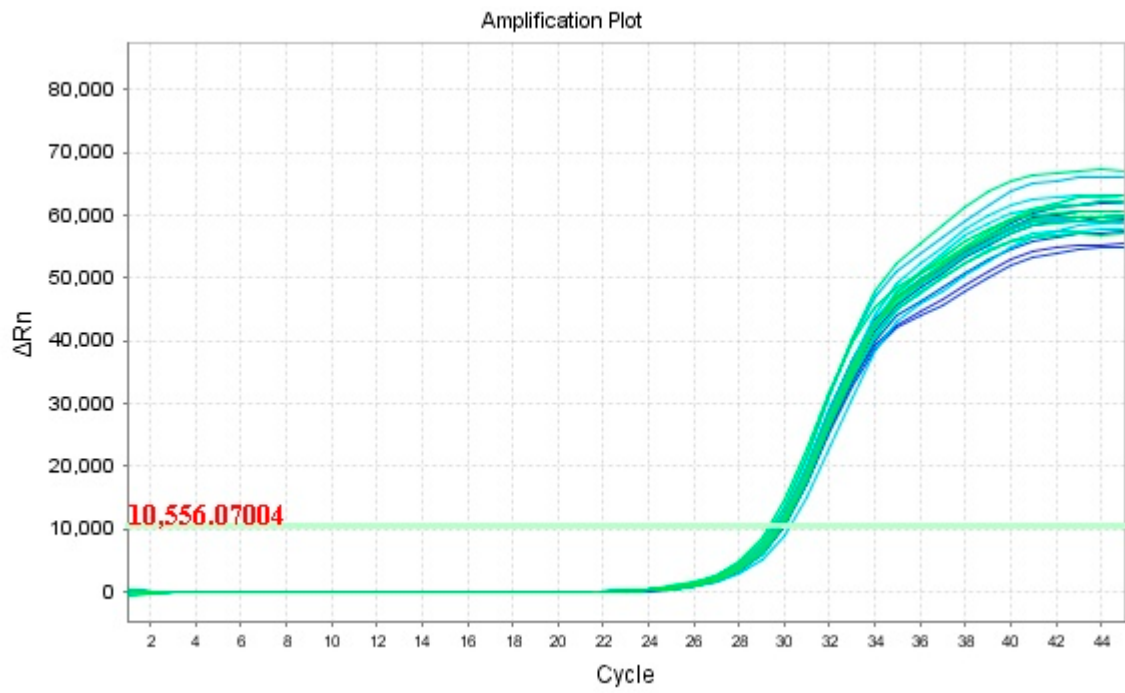

Dissolution curve

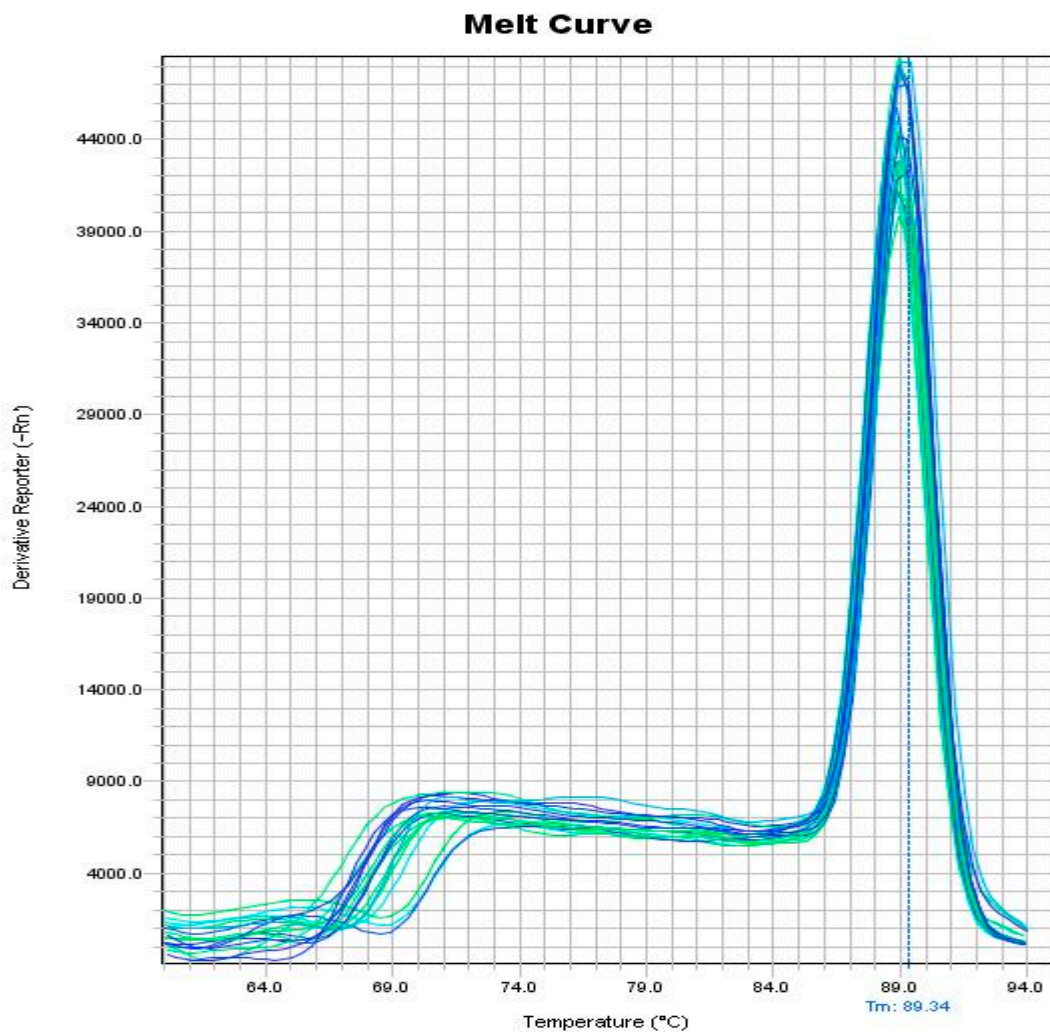

### SREBP1c: Amplification curve

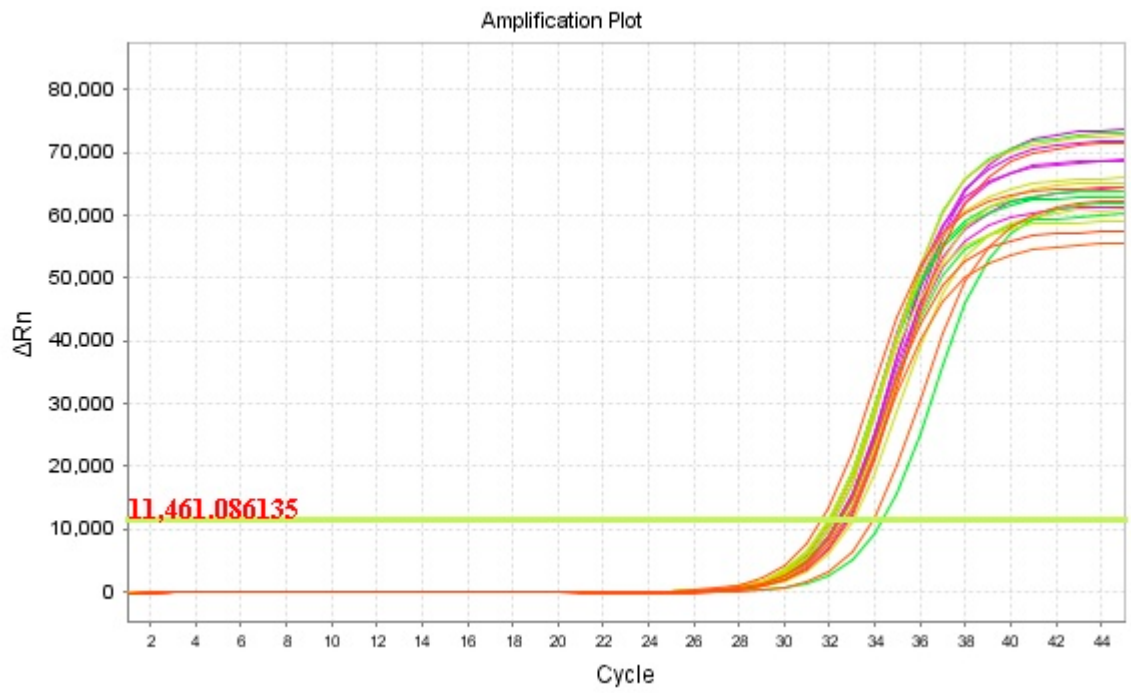

### Dissolution curve

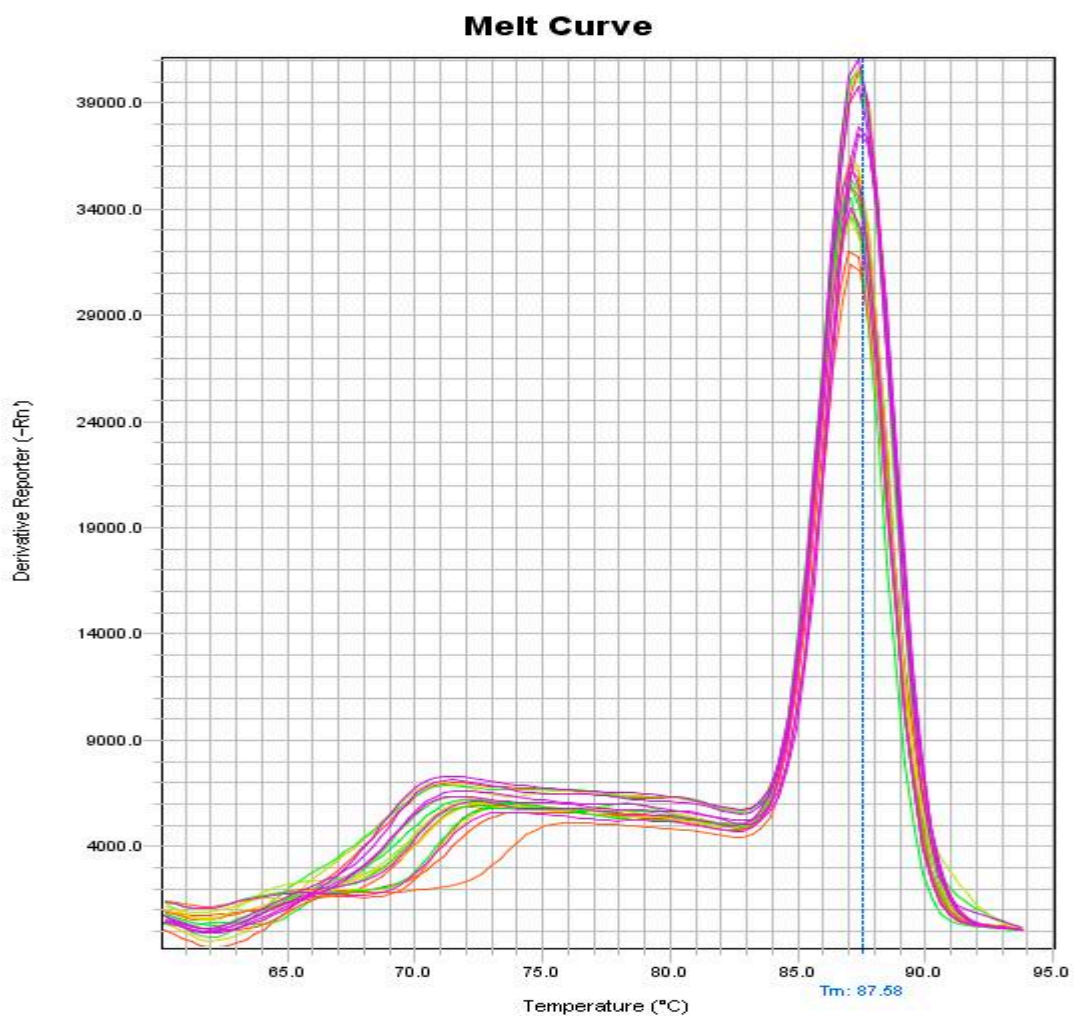

## AP2: Amplification curve

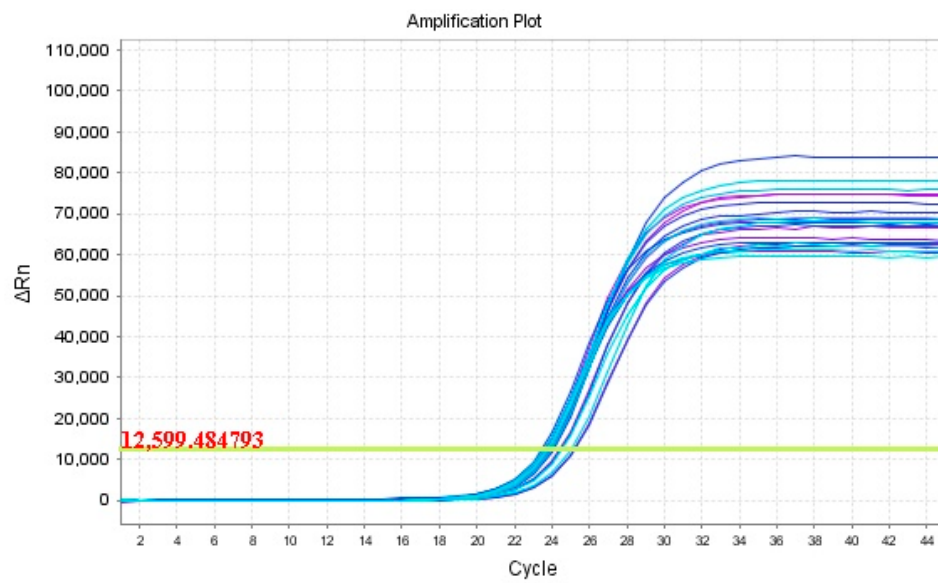

## Dissolution curve

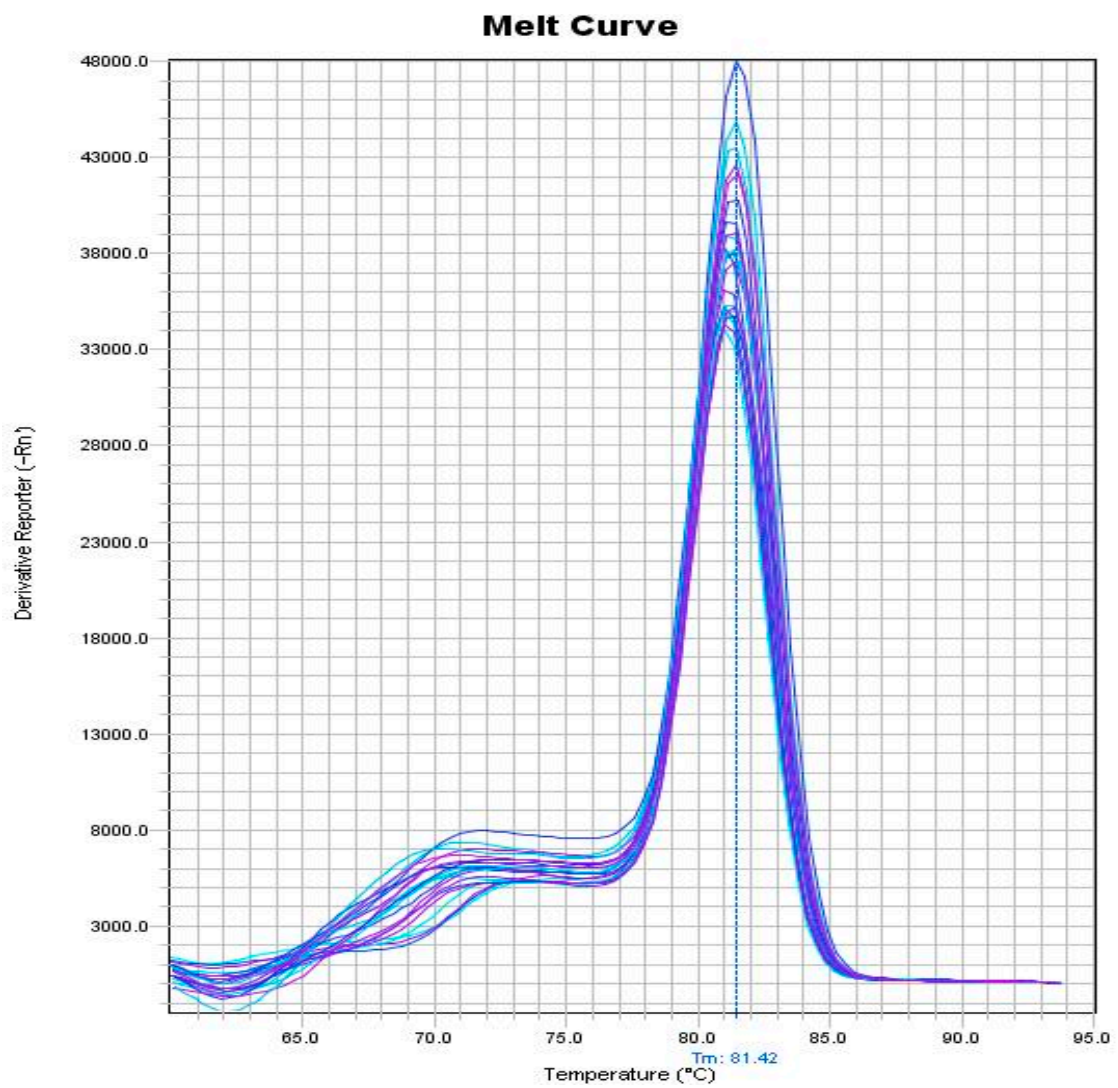

**Figure S2.** Amplification curve and Dissolution curve of  $\beta$ -actin, PPAR $\gamma$ , C/EBP $\alpha$ , C/EBP $\beta$ ,



C/EBP $\delta$ , SREBP1C, AP2.
